# Supplementary material for: Developmental toxicity of fluconazole and 1,2,4-triazole in non-target aquatic vertebrates
Source: Research Square preprint supplement (doi:10.21203/rs.3.rs-7570738/v1), 2025-10-03
Supplement: Supplementary file 1 [file 64e4d87334ad1d15d699f4ed.pdf]

## **SUPPLEMENTARY MATERIAL FILE TO:**

### **Developmental toxicity of fluconazole and 1,2,4-triazole in non-target aquatic vertebrates**

Barbora Riesova<sup>1#</sup>, Lorena Agostini Maia<sup>2#</sup>, Renata Hesova<sup>1</sup>, Nikola Peskova<sup>1,3</sup>, Petr Marsalek<sup>1</sup>, Jana Blahova<sup>1</sup>, Pavla Lakdawala<sup>1</sup>, and Jakub Harnos<sup>2✉</sup>,

<sup>1</sup>University of Veterinary Sciences Brno, Department of Animal Protection and Welfare & Veterinary Public Brno, Czech Republic.

<sup>2</sup>Masaryk University, Department of Experimental Biology, Brno, Czech Republic.

<sup>3</sup>Veterinary Research Institute, Department of Infectious Diseases and Preventive Medicine, Brno, Czech Republic.

#These authors contributed equally to this work.

✉Corresponding author: Jakub Harnos ([harnos@sci.muni.cz](mailto:harnos@sci.muni.cz)), ORCID: 0000-0002-0752-9260.

**This file contains 4 Supplementary Figures.**

| Fluconazole            | 1 µg/L | 100 µg/L | 1,000 µg/L |
|------------------------|--------|----------|------------|
| Increased pigmentation | 2      | 8        | 0          |
| Decreased pigmentation | 8      | 0        | 10         |
| Smaller head           | 6      | 5        | 2          |
| Head edema             | 2      | 2        | 1          |
| Heart edema            | 4      | 3        | 1          |
| Intestine malformation | 6      | 6        | 2          |
| Anterior malformation  | 5      | 5        | 2          |

| 1,2,4-Triazole         | 1 µg/L | 100 µg/L | 1,000 µg/L |
|------------------------|--------|----------|------------|
| Increased pigmentation | 1      | 0        | 2          |
| Decreased pigmentation | 0      | 0        | 1          |
| Smaller head           | 1      | 1        | 3          |
| Head edema             | 0      | 0        | 2          |
| Heart edema            | 1      | 0        | 1          |
| Intestine malformation | 1      | 1        | 3          |
| Anterior malformation  | 2      | 2        | 3          |
| Curved spine           | 0      | 1        | 0          |
| Fin malformation       | 0      | 1        | 0          |

**Supplementary Figure 1. Spectrum and frequency of malformations in *Xenopus laevis* tadpoles exposed to fluconazole (FLU) or 1,2,4-triazole (TRI).** Tadpoles were exposed continuously from fertilization to NF stage 46 to three concentrations (1, 100, or 1,000 µg/L) of FLU or TRI. The number of individuals displaying each malformation type is shown for each concentration (n = 24 per group). Phenotype counts represent the total number of affected individuals within each treatment group. No malformations were observed in the control group.

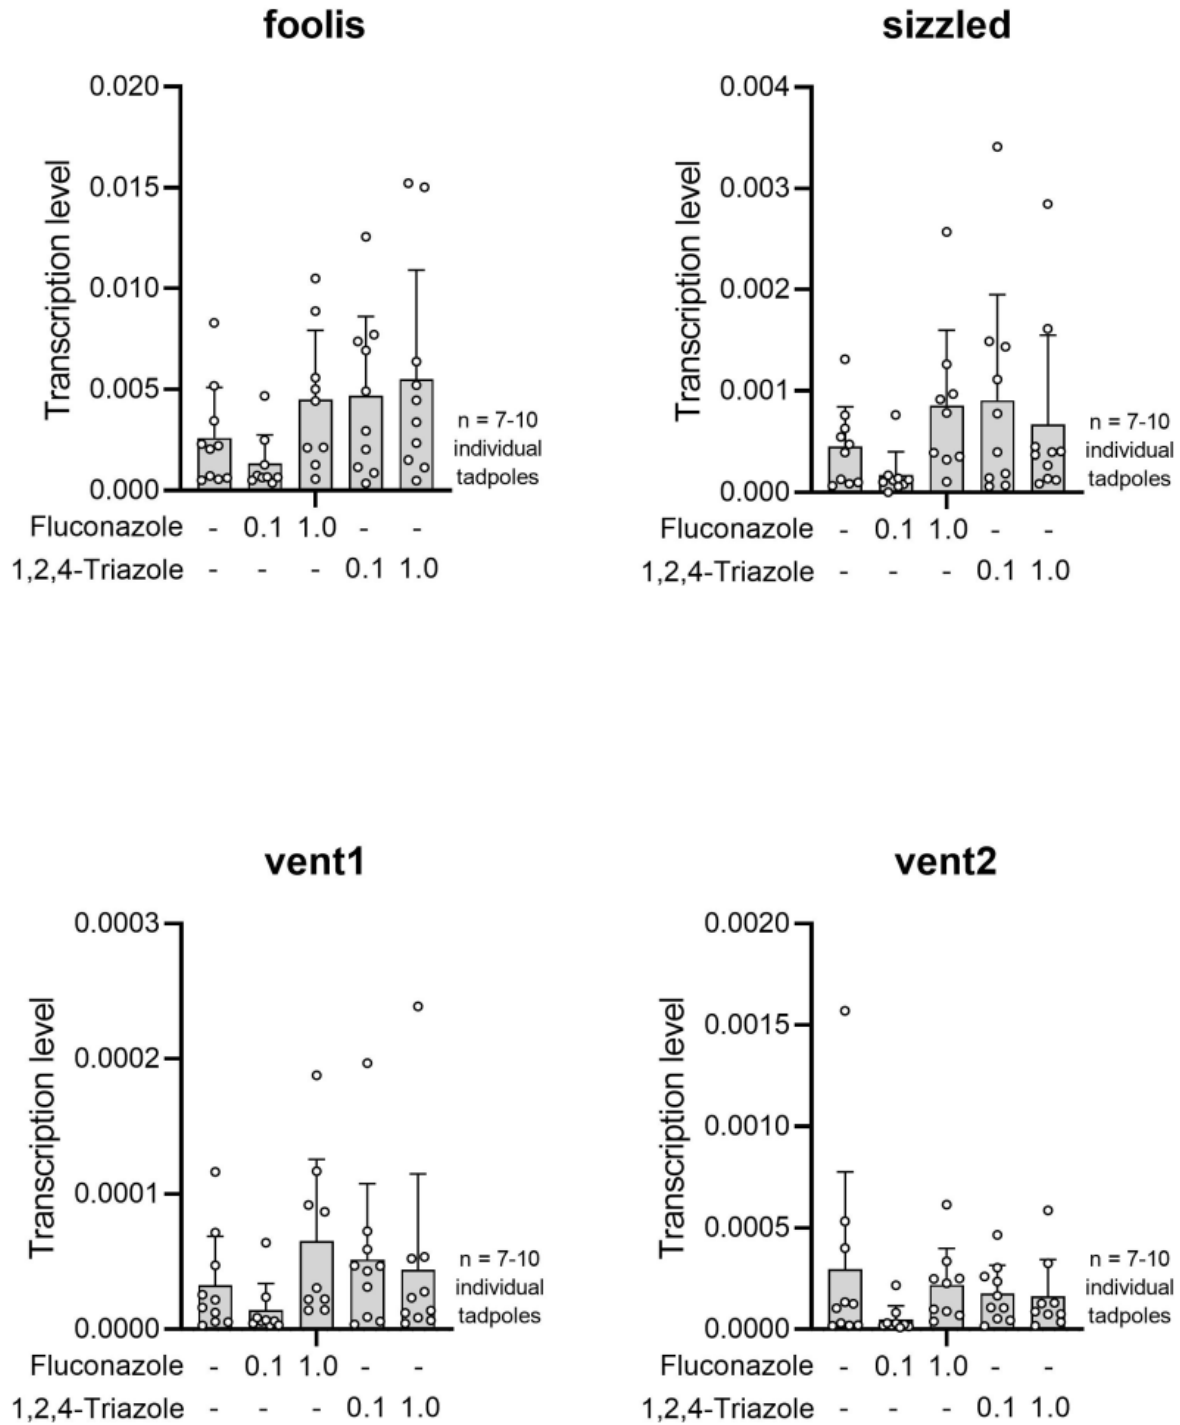

**Supplementary Figure 2. Expression analysis of additional developmental genes in *Xenopus laevis* embryos exposed to FLU and TRI.** No significant changes were detected in the expression of *dickkopf*, *goosecoid*, *sizzled*, *vent1*, and *vent2* at 120 hpf, indicating that the observed effects are restricted to a subset of Wnt/BMP regulators. Data represent mean fold-change  $\pm$  SD from 7-10 embryos. No statistical significance using ANOVA with Dunnett's test was found.

| Fluconazole (10 µg/l) |                               |                                                      |
|-----------------------|-------------------------------|------------------------------------------------------|
| Sample                | Measured concentration (µg/l) |                                                      |
| Day1_0h               | 10.5                          | The remaining samples are below the detection limit. |
| Day1_24h              | 9.89                          |                                                      |
| Day2_2_0h             | 11.3                          | <b>LOD (Limit of Detection):</b><br><b>0.55 µg/l</b> |
| Day2_24h              | 10.7                          |                                                      |
| Day3_0h               | 10.3                          |                                                      |
| Day3_24h              | 11.2                          |                                                      |
| Day4_0h               | 11.2                          |                                                      |
| Day4_24h              | 9.75                          |                                                      |
| Day5_24h              | 10.3                          |                                                      |

| 1,2,4-Triazole (100 µg/l) |                               |                                                      |
|---------------------------|-------------------------------|------------------------------------------------------|
| Sample                    | Measured concentration (µg/l) |                                                      |
| Day1_0h                   | 104                           | The remaining samples are below the detection limit. |
| Day1_24h                  | 104                           |                                                      |
| Day2_2_0h                 | 105                           | <b>LOD (Limit of Detection):</b><br><b>0.47 µg/l</b> |
| Day2_24h                  | 108                           |                                                      |
| Day3_0h                   | 108                           |                                                      |
| Day3_24h                  | 104                           |                                                      |
| Day4_0h                   | 110                           |                                                      |
| Day4_24h                  | 112                           |                                                      |
| Day5_24h                  | 100                           |                                                      |

**Supplementary Figure 3. Verification of chemical concentrations in exposure media using HPLC analysis.** Measured concentrations of fluconazole and triazole in embryo culture media closely matched nominal values, confirming stability of both compounds throughout the 5-day exposure period. Values are shown for representative doses used in qPCR experiments (10 µg/L FLU and 100 µg/L TRI).

| Primer name       | Sequence (5'→3')          |
|-------------------|---------------------------|
| B-catenin fwd     | AGATGCAGCAACTAAACAGGA     |
| B-catenin rev     | GTACTGCATTTTGAGCCATCT     |
| Cerberus fwd      | GCTGAACTATTTGATTTACCC     |
| Cerberus rev      | ATGGCTTGTATTCTGTGGGGCG    |
| Chordin fwd       | CCTCCAATCCAAGACTCCAGCAG   |
| Chordin rev       | GGAGGAGGAGGAGCTTTGGGACAAG |
| Noggin fwd        | AGTTGCAGATGTGGCTCT        |
| Noggin rev        | AGTCCAAGAGTCTCAGCA        |
| Follistatin fwd   | CAGTGCAGCGCTGGAAAGAAAT    |
| Follistatin rev   | TGCGTTGCGGTAATTCACCTAC    |
| Dickkopf-1 fwd    | CACCAAGCACAGGAGGAA        |
| Dickkopf-1 rev    | TCAGGGAAGACCAGAGCA        |
| Goosecoid fwd     | CACACAAAGTCGCAGAGTCTC     |
| Goosecoid rev     | GGAGAGCAGAAGTTGGGGCCA     |
| Xolloid fwd       | GCTGGAAGTATGTGAATGGAG     |
| Xolloid rev       | GTCTTCCTGCTCCTCTGC        |
| Xbra fwd          | TTAAGTGCGGATGAGGTCC       |
| Xbra rev          | AAGTAGGGCAGAGGGGCA        |
| Szl (Sizzled) fwd | GGCTGTGTTAGTGACCGTGA      |
| Szl (Sizzled) rev | TCAAGCGGCCGCGATTTTTCA     |
| Vent-1 fwd        | TCCCTGCACGAGTTGCAAC       |
| Vent-1 rev        | GCATTTGGCCTGAATTTTGG      |
| Vent-2 fwd        | TGCATCTGCTCGAATTTTCG      |
| Vent-2 rev        | CCTCTCTTGATGCCTGTGCCT     |

**Supplementary Figure 4. List of primers used in this study.** Sequences of primers employed for qRT-PCR and cloning experiments. Forward (fwd) and reverse (rev) primers for each gene are listed in the 5'→3' orientation.
